# Supplementary material
Source: publisher site journal article supplement (https://www.spandidos-publications.com/5500/downloadSupplementary)

Figure S1. NTRK1/2/3 gene testing of the patient (fluorescence *in situ* hybridization). NTRK, neurotrophic tyrosine kinase receptor.

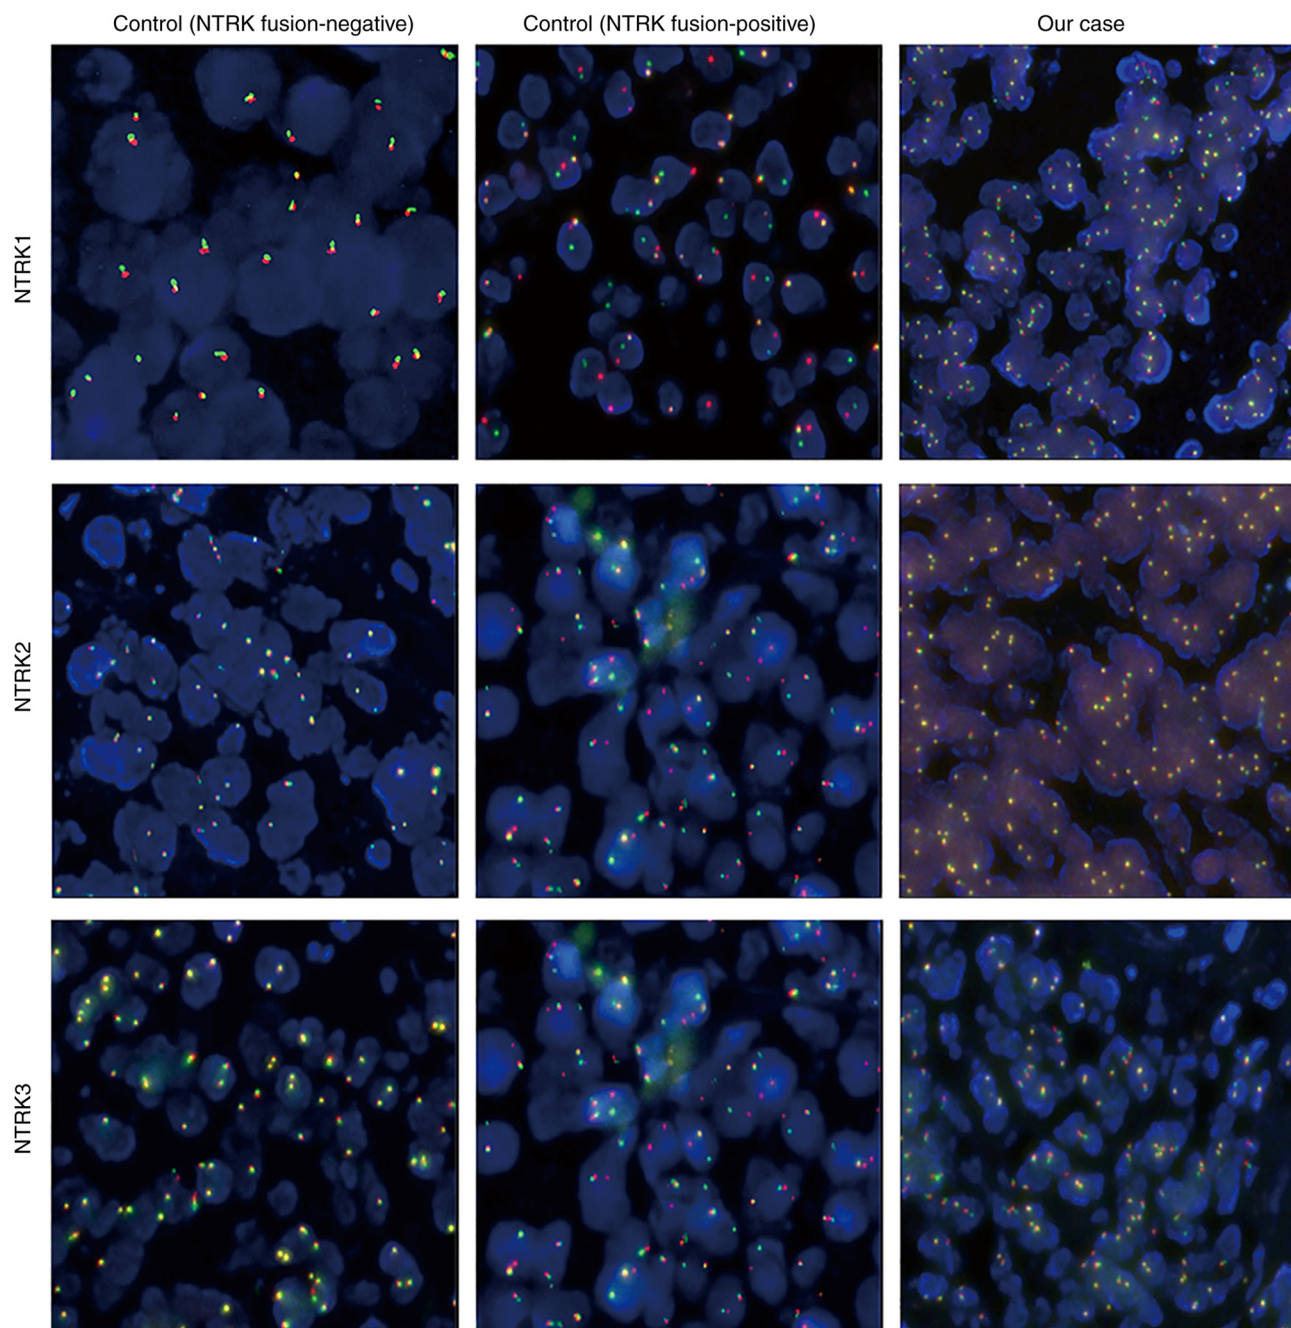

Supplement: Supplementary file 1 [file downloadSupplementary]
